# Supplementary material for: Optofluidic tunable lenses using laser-induced thermal gradient
Source: Royal Society of Chemistry journal article supplement (doi:10.1039/c5lc01163a), 2015-11-09
Supplement: c5lc01163a1.zip [file 1163 ESI.doc]

**Optofluidic tunable lenses using laser-induced thermal gradient**

**Electronic Supplementary Information**

1. **Measurement of temperature field**

Direct measurement of the temperature field in the microchamber is conducted by the use of the temperature dependency of rhodamine B fluorescence [S1]. It includes two steps. The first step is to determine the empirical expression of the temperature as a function of the fluorescence intensity by polynomial fitting. In the second step, the unknown temperature is calculated using the obtained empirical expression once the fluorescence intensity is measured. More details are presented below.

In the first step, the fluorescence intensities at different temperatures are tested. Then, all the fluorescence intensities are normalized to that at 25oC. The measured relationship is plotted in Fig. S1. As can be seen that the fluorescence intensity decreases gradually with the increase of temperature. The dependency can be fitted by

（S1）

where *T* is the temperature and *I* is the normalized fluorescence intensity.

Fig. S1: Normalized fluorescence intensity of the rhodamine B solution versus temperature.

In the second step, when the fluorescence intensity of the same rhodamine B solution is measured, it is normalized with respect to the fluorescence intensity at 25 oC, the obtained value is then substituted into Eq. (S1) to get the temperature.

1. **Measurement of thermo-optic coefficient of benzyl alcohol**

To determine the thermo-optic coefficient (TOC) of benzyl alcohol, we conducted another experiment using the Fresnel reflection method [S2]. The working principle is illustrated in Figure S2. A broadband light (central wavelength 1550 nm, bandwidth 20 nm) from a light emitting diode (LED) enters port 1 of an optical circulator and goes out from port 2, which is connected to a single-mode optical fiber (Corning SMF-28e). The other end of the fiber is cleaved and immerged into the liquid sample, whose temperature is controlled by a water bath and is monitored by a thermometer. When the light hits the fiber/liquid interface (see the inset of Fig. S2), it undergoes a Fresnel reflection under normal incidence. The reflected light goes back to port 2 of the optical circulator and then passes to port 3, whose power is measured by an optical power meter.

The Fresnel reflection at the fiber/liquid interface is given by

(S2)

here *nf* is the refractive index of optical fiber and *n*1 is that of liquid sample.

Benzyl alcohol

Fig. S2: Schematic of the Fresnel reflection method for refractive index measurement.

To offset the influence of fiber connection and temperature-dependence of fiber refractive index, we first used the air as the sample and measured the reflected power at different temperatures, and then used these data as the reference. The processed refractive index of benzyl alcohol is plotted in Fig. S3 over 23 – 85 oC. Every data point represents 5 measurements, and the error bars indicate the standard deviation of 5 measurements. The linear fitting of data points in Fig. S3 is

(S3)

From the slope of linear fit, the TOC of benzyl alcohol is **(-5.079 ± 0.059)  10-4 oC-1**.

Fig. S3: Refractive index of benzyl alcohol versus temperature by the Fresnel reflection method.

1. **Analysis of the measured focal spot size**

To experimentally demonstrate the ray tracing, Rhodamine B dye is added into the solution. The dye absorbs green light and emits yellow fluorescence for visualization of the ray path. However, the fluorescence often causes an enlargement of the focal spot size due to the scattering, especially when the green probe laser is strong. For instance, the size of the focal spot is about 15.2 m when the coupled probe laser is *Pprobe* =1.0 mW (see also Fig. S4a), and it is reduced to 9.8 m when the coupled laser is very weak to let only the focal spot visible (see Fig. S4b). The size of 9.8 m is about two times of the theoretical limit 5.5 m. Take the enlargement of fluorescence imaging into consideration, the above results are acceptable.


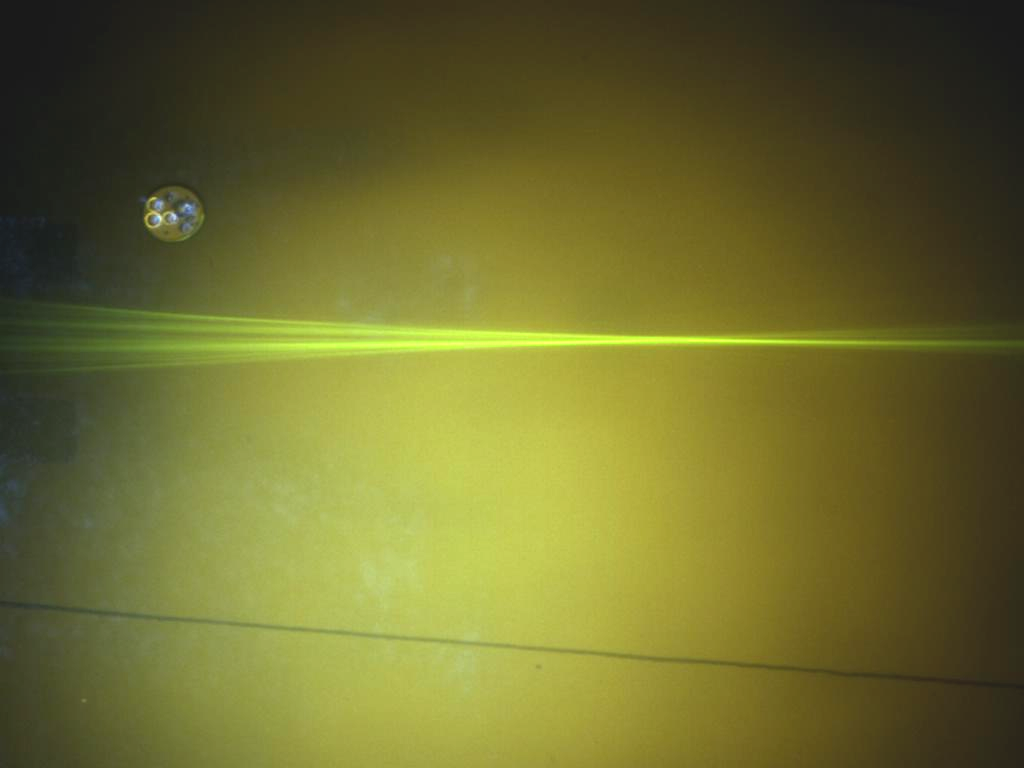

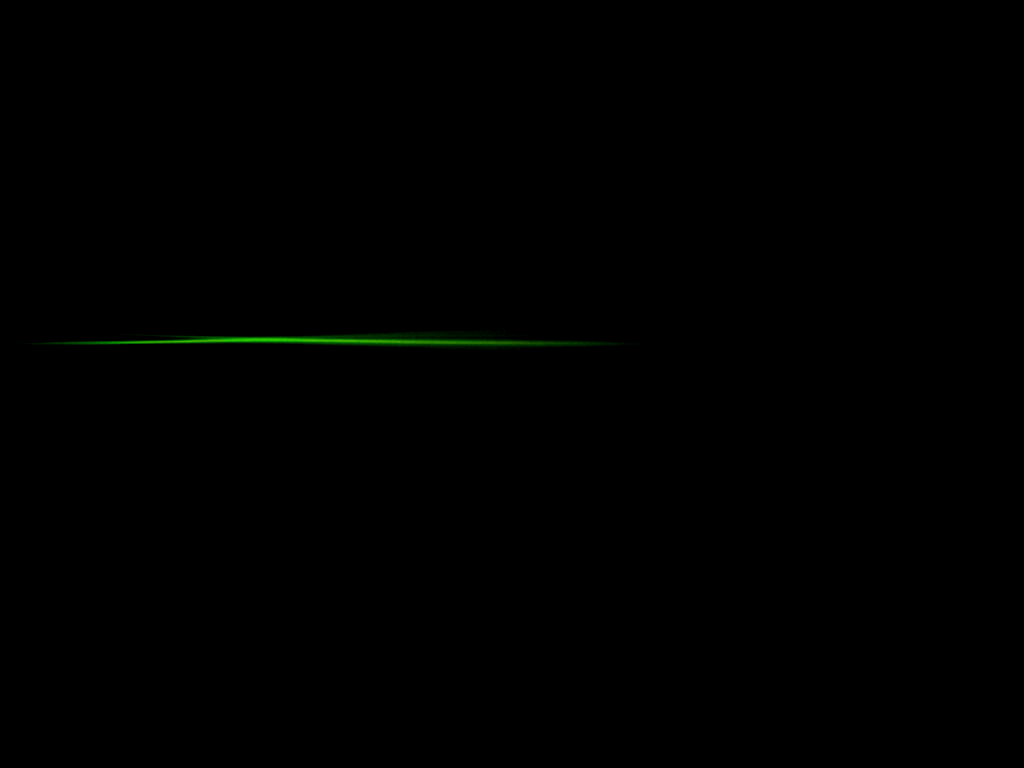


15.2 µm

9.8 µm

250 µm

Metal strip

(a)

(b)

Fig. S4: Analysis of the focal spot size. (a) Ray tracing when the probe laser power *Pprobe* = 1.0 mW, for which the focal spot size is 15.2 m.(b) The focal spot is redueced to 9.8 m when the probe laser power is tuned to very weak. Other condictions are *v* = 2.06 mm/s, *Pi* = 0.6 W/mm2, *f* = 1.30 mm.


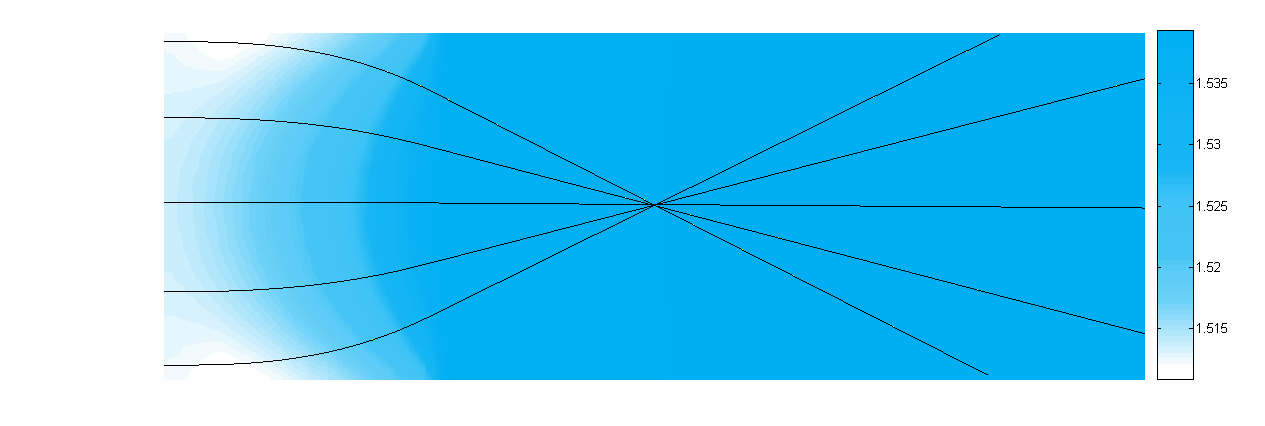

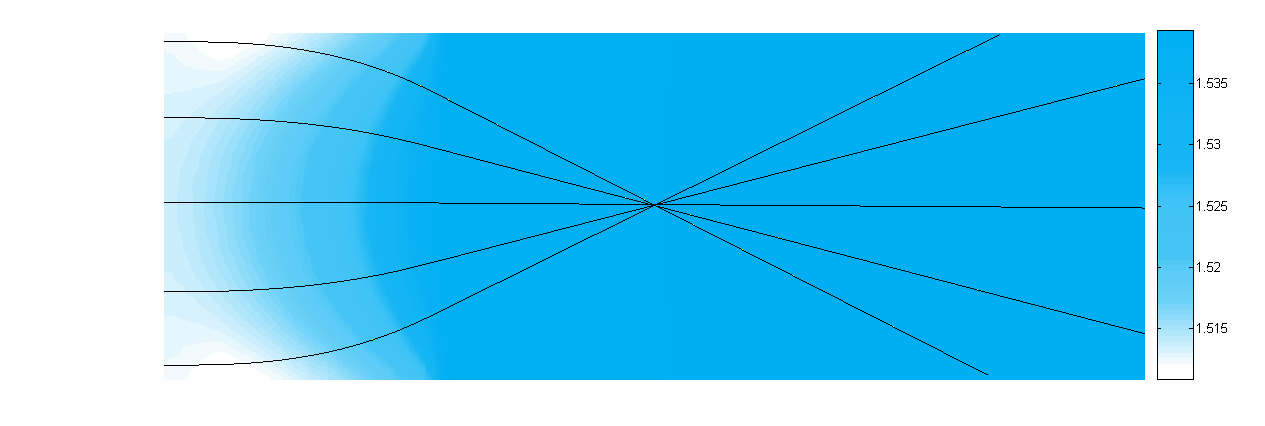


1.50

1.52

1.54


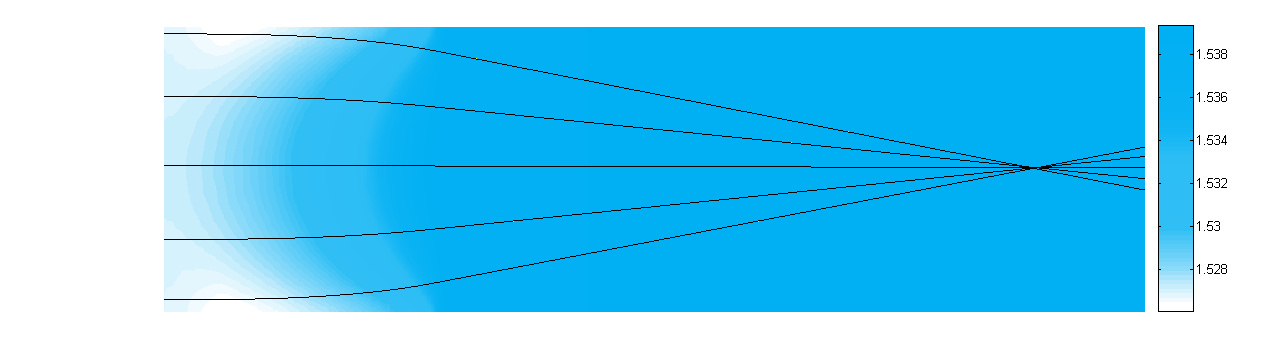

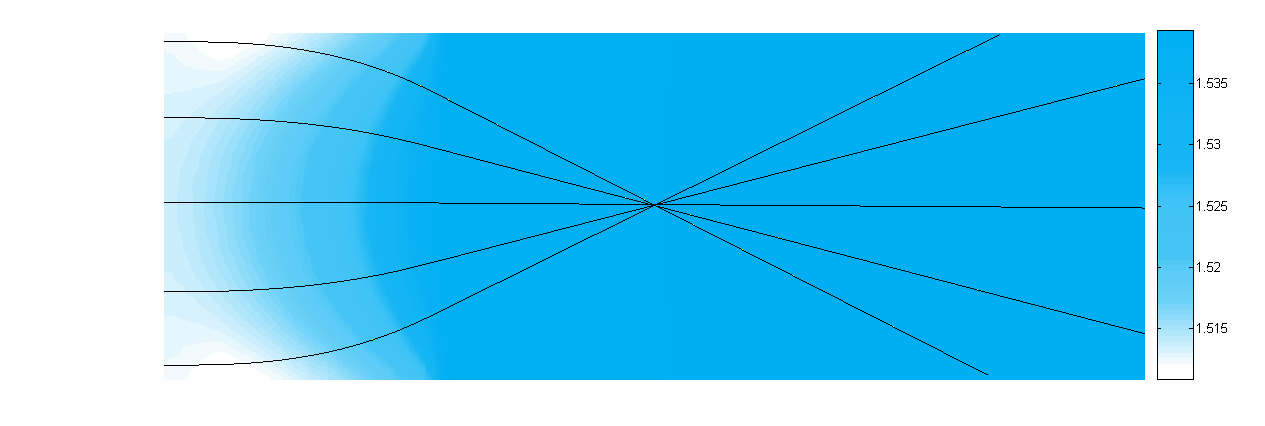


1.52

1.53

1.54

Fig. S5: Ray tracing simulation. (a) *Ps* = 0.31 W/mm2, *f* = 1.478 mm. (b) *Ps* = 0.12 W/mm2, *f* = 3.25 mm. Both exhibit almost perfect focusing. For simulation, the flow velocity is always *v* = 6.17 mm/s.

1. **Aberration-free focusing verified by simulation**

In simulation, the focusing properties are examined. First, a CFD (computational fluidic dynamics) programme is used to calculated the temperature profile and the corresponding refractive index profile. Then, a ray tracing simulaiton is conducted to analyze the focusing performance and the focal length. Fig. S5 shows the ray tracing results for two pump laser intensities *Ps* = 0.31 W/mm2 and *Ps* = 0.12 W/mm2, which produces the focal lengths *f* = 1.478 mm and *f* = 3.25 mm, respectively. From Fig. S5a and S5b, it can be seen that both result in almost perfect focusing, or in the other words, aberration-free focusing. Further simulation shows that such an aberration-free focusing can be maintained during the whole tuning process of the focal lengths. This is because the refractive index distribution follows the square-law parabolic function in any cross section along the optical axis (see Eq. (1b)).

1. **Comparison of the simulated and experimental results**


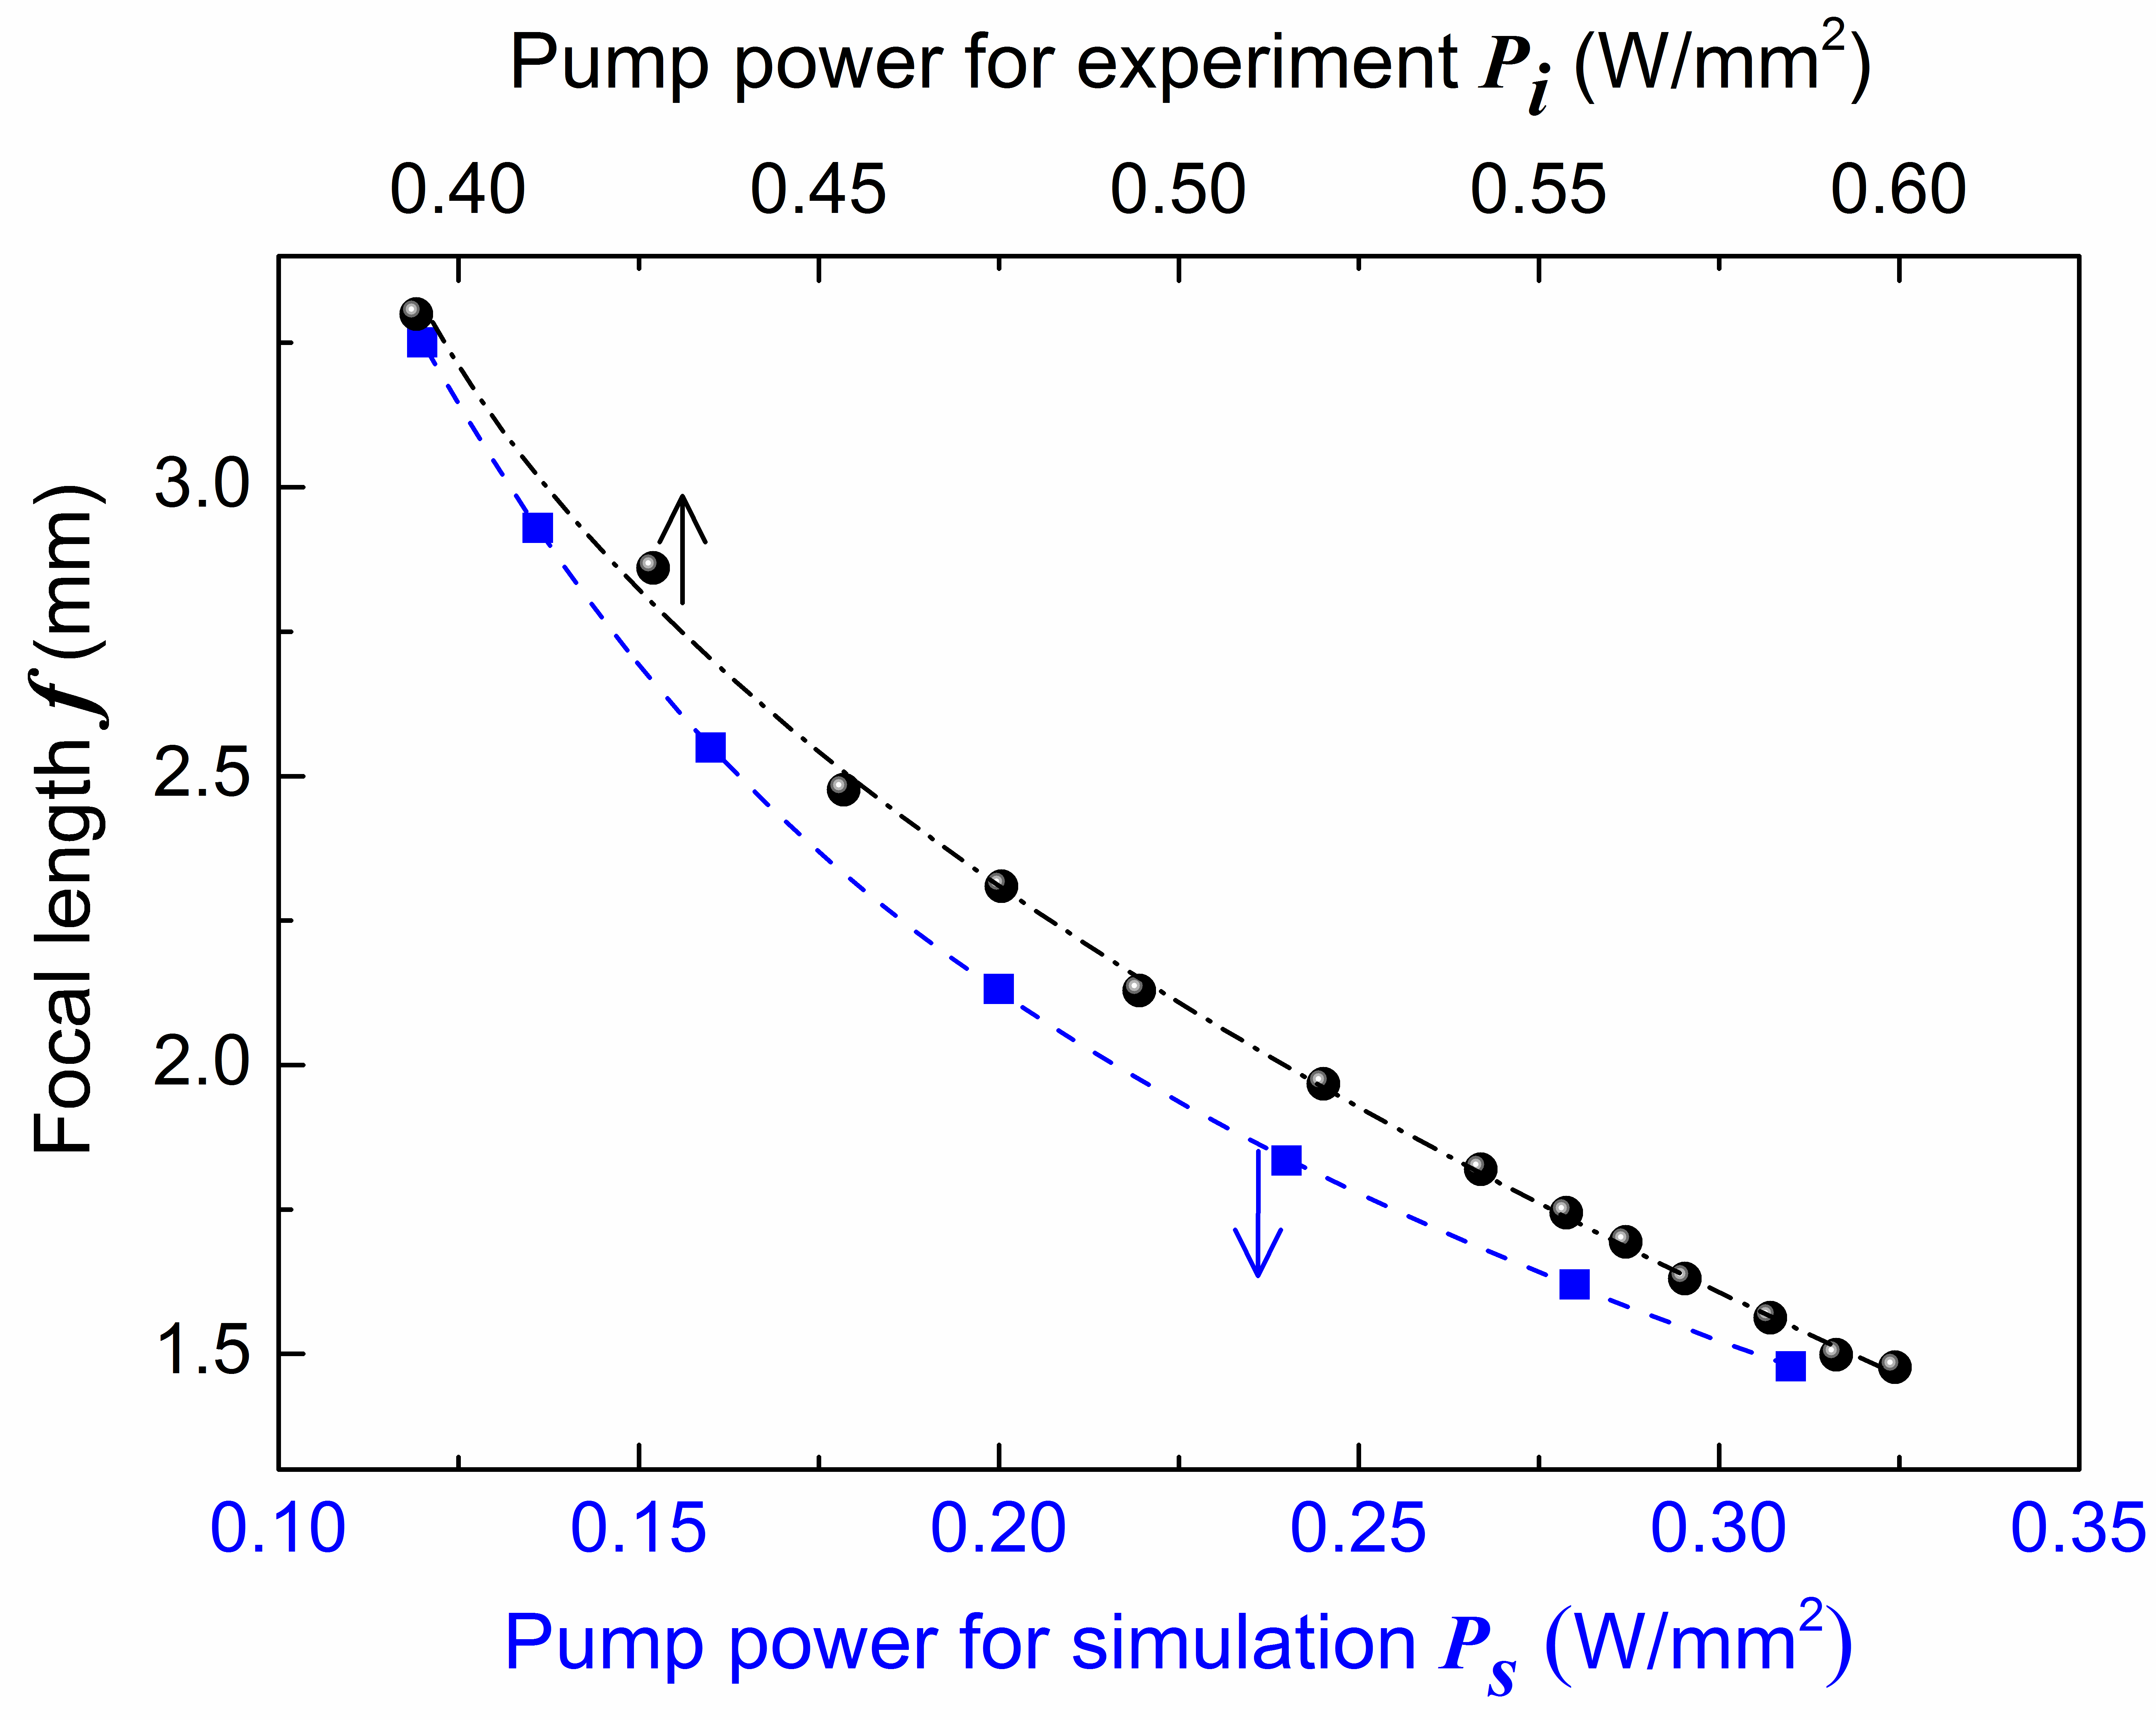
Figure S6 displays both the simulated and experimental relationships between the focal length and the pump power intensity. Since only a portion of the laser energy is absorbed by the metal strips and converted into the heat energy, the pump power intensity *Pi*of the experiment is different from the net intensity *Ps* used in the simulation. The absorption efficiency is *Ps*/*Pi* = 51.7% for *Pi* = 0.60 W/mm2. After the conversion of the absorption efficiency, the two curves in Fig. S6 match roughly with each other.

Fig. S6: Comparison between simulated and experimental results, *v* = 6.17 mm/s, the top and bottom *x* axes are the experimental and simulated pump power intensities, respectively. After a conversion using the absorption efficiency, the two curves match well with each other.

**Reference:**

1. D. Ross, M. Gaitan, and L. E. Locascio, “Temperature measurement in microfluidic systems using a temperature-dependent fluorescent dye,” *Anal. Chem.*, vol. 73, pp. 4117–23, 2001.
2. M. G. Shlyagin, R. M. Manuel, & Ó. Esteban, “Optical-fiber self-referred refractometer based on Fresnel reflection at the fiber tip,” *Sens. Actuators B*, vol. 178, pp. 263–269, 2013.
